# Supplementary material for: The impact of synoptic meteorology on observed surface heat fluxes over the Southern Ocean
Source: Copernicus journal article supplement (doi:10.5194/egusphere-2025-3776), 2025-08-15
Supplement: Supplementary file 1 [file egusphere-2025-3776-supplement.pdf]

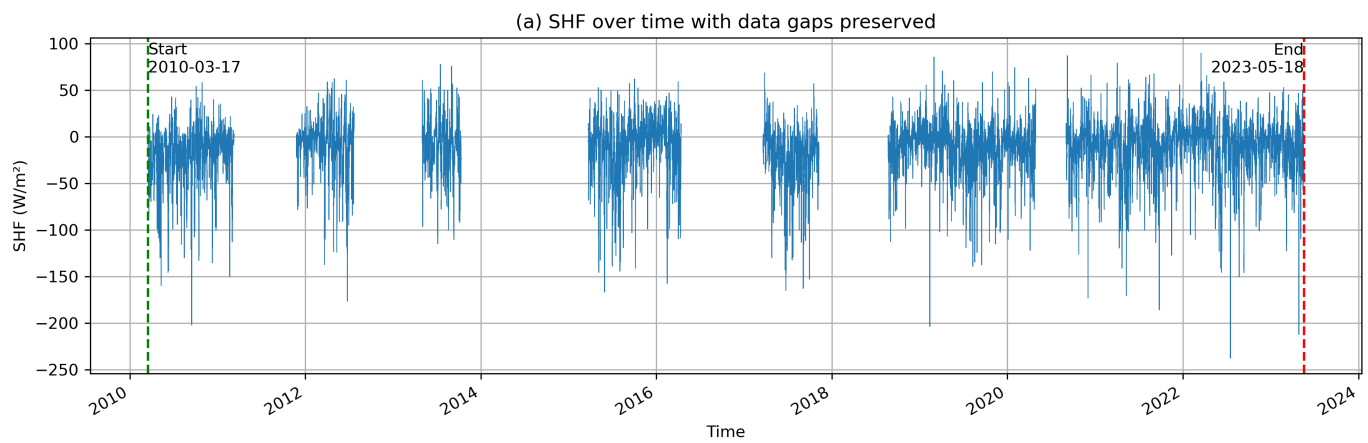

Figure S1: Time series of SHF derived from SOFS mooring data, with gaps indicating missing time steps in the dataset.

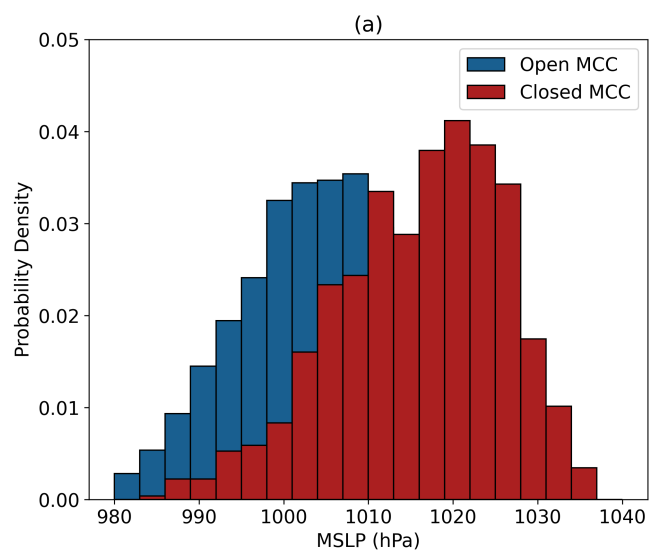

Figure S2: Probability density distribution of MSLP during open and closed MCC conditions.
